# Supplementary material for: [Ag(Sn9–Sn9)]5− and [(η4-Sn9)Ag(η1-Sn9)]7−, as aggregates of spherical aromatic building blocks. Persistence of aromaticity upon cluster gathering
Source: Royal Society of Chemistry journal article supplement (doi:10.1039/d3cp05394f), 2024-01-01
Supplement: d3cp05394f2.pdf [file d3cp05394f2.pdf]

-- Supporting Information for: --

# **[Ag(Sn<sub>9</sub>–Sn<sub>9</sub>)]<sup>5-</sup> and [(η<sup>4</sup>-Sn<sub>9</sub>)Ag(η<sup>1</sup>-Sn<sub>9</sub>)]<sup>7-</sup>, as Aggregates of Spherical Aromatic Building Blocks. Persistence of Aromaticity Upon Cluster Gathering**

Peter L. Rodríguez-Kessler,<sup>a</sup> Alvaro Muñoz-Castro<sup>b\*</sup>

<sup>a</sup>Centro de Investigaciones en Óptica A.C., Loma del Bosque 115, Col. Lomas del  
Campestre, León, Guanajuato, 37150, Mexico. E-mail: plkessler@cio.mx

<sup>b</sup>Facultad de Ingeniería, Arquitectura y Diseño, Universidad San Sebastián, Bellavista 7,  
Santiago, 8420524, Chile. E-mail: alvaro.munozc@uss.cl

## **Content**

Figure S1. Structures for both *eclipsed*- and *staggered*- conformations of [(<sup>3</sup>μ-  
Sn<sub>9</sub>)Ag(<sup>3</sup>μ-Sn<sub>9</sub>)]<sup>4-</sup>. Page 2

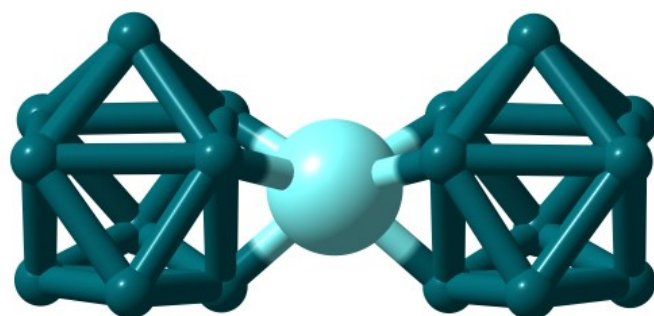

eclipsed- $[(^3\mu\text{-Sn}_9)\text{Ag}(^3\mu\text{-Sn}_9)]^q-$

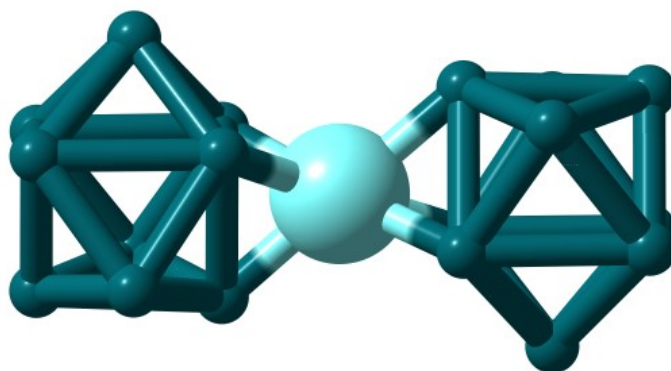

staggered- $[(^3\mu\text{-Sn}_9)\text{Ag}(^3\mu\text{-Sn}_9)]^q-$

Figure S1. Structures for both *eclipsed*- and *staggered*- conformations of  $[(^3\mu\text{-Sn}_9)\text{Ag}(^3\mu\text{-Sn}_9)]^q-$ .
